# Supplementary material for: Prediction of HIV-1 protease resistance using genotypic, phenotypic, and molecular information with artificial neural networks
Source: PeerJ. 2023 Mar 21;11:e14987. doi: 10.7717/peerj.14987 (PMC10038082; doi:10.7717/peerj.14987)
Supplement: Data S1 [file peerj-11-14987-s001.xlsx]

## Sheet: Sheet1
Drug_Compound	SMILES	WildType	Strain	Activity	AssayType	FoldChange	CHEMBLDocumentID
5m	COc1ccc2c(c1)COCCCCCCCN(C[C@@H](O)[C@H](Cc1ccccc1)NC(=O)O[C@H]1CO[C@H]3OCC[C@@H]13)S2(=O)=O	3.6	L10I/I15V/K20R/L24I/V32I/M36I/M46L/L63P/V82A/L89M	240	IC50(nM)	No	CHEMBL4043264
5o	Nc1ccc2c(c1)COCCCCCCCN(C[C@@H](O)[C@H](Cc1ccccc1)NC(=O)O[C@H]1CO[C@H]3OCC[C@@H]13)S2(=O)=O	1.5	L10I/I15V/K20R/L24I/V32I/M36I/M46L/L63P/V82A/L89M	20	IC50(nM)	No	CHEMBL4043264
darunavir	CC(C)CN(C[C@@H](O)[C@H](Cc1ccccc1)NC(=O)O[C@H]1CO[C@H]2OCC[C@@H]12)S(=O)(=O)c1ccc(N)cc1	1.8	L10I/I15V/K20R/L24I/V32I/M36I/M46L/L63P/V82A/L89M	87	IC50(nM)	No	CHEMBL4043264
13	COC(=O)NCCC(C)(C)CN(C[C@@H](O)[C@H](Cc1ccccc1)NC(=O)O[C@H]1CO[C@H]2OCC[C@@H]12)S(=O)(=O)c1ccc2c(c1)OCO2	1.4	M46I/L63P/A71V/V82L/I84V	22	IC50(nM)	No	CHEMBL1138692
20	COC(=O)NCCCCC(C)(C)CN(C[C@@H](O)[C@H](Cc1ccccc1)NC(=O)O[C@H]1CO[C@H]2OCC[C@@H]12)S(=O)(=O)c1ccc2c(c1)OCO2	1.6	M46I/L63P/A71V/V82L/I84V	15	IC50(nM)	No	CHEMBL1138692
15	COC(=O)NCCCCCC(C)(C)CN(C[C@@H](O)[C@H](Cc1ccccc1)NC(=O)O[C@H]1CO[C@H]2OCC[C@@H]12)S(=O)(=O)c1ccc2c(c1)OCO2	5.5	M46I/L63P/A71V/V82L/I84V	46	IC50(nM)	No	CHEMBL1138692
amprenavir	CC(C)CN(C[C@@H](O)[C@H](Cc1ccccc1)NC(=O)O[C@H]1CCOC1)S(=O)(=O)c1ccc(N)cc1	130	M46I/L63P/A71V/V82L/I84V	440	IC50(nM)	No	CHEMBL1138692
indinavir	CC(C)(C)NC(=O)[C@@H]1CN(Cc2cccnc2)CCN1C[C@@H](O)C[C@@H](Cc1ccccc1)C(=O)N[C@H]1c2ccccc2C[C@H]1O	50	M46I/L63P/A71V/V82L/I84V	330	IC50(nM)	No	CHEMBL1138692
nelfinavir	Cc1c(O)cccc1C(=O)N[C@@H](CSc1ccccc1)[C@H](O)CN1C[C@H]2CCCC[C@H]2C[C@H]1C(=O)NC(C)(C)C	320	M46I/L63P/A71V/V82L/I84V	450	IC50(nM)	No	CHEMBL1138692
13	COC(=O)NCCC(C)(C)CN(C[C@@H](O)[C@H](Cc1ccccc1)NC(=O)O[C@H]1CO[C@H]2OCC[C@@H]12)S(=O)(=O)c1ccc2c(c1)OCO2	1.4	L10I/L19Q/K20R/E35D/M36I/S37N/M46I/I50V/I54V/I62V/L63P/A71V/V82A/L90M/E28K/K32E/V35I/T39T/E40DV/M41L/K43E/Y181Y	40	IC50(nM)	No	CHEMBL1138692
20	COC(=O)NCCCCC(C)(C)CN(C[C@@H](O)[C@H](Cc1ccccc1)NC(=O)O[C@H]1CO[C@H]2OCC[C@@H]12)S(=O)(=O)c1ccc2c(c1)OCO2	1.6	L10I/L19Q/K20R/E35D/M36I/S37N/M46I/I50V/I54V/I62V/L63P/A71V/V82A/L90M/E28K/K32E/V35I/T39T/E40DV/M41L/K43E/Y181Y	9.2	IC50(nM)	No	CHEMBL1138692
15	COC(=O)NCCCCCC(C)(C)CN(C[C@@H](O)[C@H](Cc1ccccc1)NC(=O)O[C@H]1CO[C@H]2OCC[C@@H]12)S(=O)(=O)c1ccc2c(c1)OCO2	5.5	L10I/L19Q/K20R/E35D/M36I/S37N/M46I/I50V/I54V/I62V/L63P/A71V/V82A/L90M/E28K/K32E/V35I/T39T/E40DV/M41L/K43E/Y181Y	65	IC50(nM)	No	CHEMBL1138692
amprenavir	CC(C)CN(C[C@@H](O)[C@H](Cc1ccccc1)NC(=O)O[C@H]1CCOC1)S(=O)(=O)c1ccc(N)cc1	130	L10I/L19Q/K20R/E35D/M36I/S37N/M46I/I50V/I54V/I62V/L63P/A71V/V82A/L90M/E28K/K32E/V35I/T39T/E40DV/M41L/K43E/Y181Y	1000	IC50(nM)	No	CHEMBL1138692
indinavir	CC(C)(C)NC(=O)[C@@H]1CN(Cc2cccnc2)CCN1C[C@@H](O)C[C@@H](Cc1ccccc1)C(=O)N[C@H]1c2ccccc2C[C@H]1O	50	L10I/L19Q/K20R/E35D/M36I/S37N/M46I/I50V/I54V/I62V/L63P/A71V/V82A/L90M/E28K/K32E/V35I/T39T/E40DV/M41L/K43E/Y181Y	440	IC50(nM)	No	CHEMBL1138692
nelfinavir	Cc1c(O)cccc1C(=O)N[C@@H](CSc1ccccc1)[C@H](O)CN1C[C@H]2CCCC[C@H]2C[C@H]1C(=O)NC(C)(C)C	320	L10I/L19Q/K20R/E35D/M36I/S37N/M46I/I50V/I54V/I62V/L63P/A71V/V82A/L90M/E28K/K32E/V35I/T39T/E40DV/M41L/K43E/Y181Y	1000	IC50(nM)	No	CHEMBL1138692
amprenavir	CC(C)CN(C[C@@H](O)[C@H](Cc1ccccc1)NC(=O)O[C@H]1CCOC1)S(=O)(=O)c1ccc(N)cc1	33	L10I/K14R/R41K/M46L/I54V/L63P/A71V/V82A/L90M/I93L	290	IC50(nM)	No	CHEMBL1140100
indinavir	CC(C)(C)NC(=O)[C@@H]1CN(Cc2cccnc2)CCN1C[C@@H](O)C[C@@H](Cc1ccccc1)C(=O)N[C@H]1c2ccccc2C[C@H]1O	26	L10I/K14R/R41K/M46L/I54V/L63P/A71V/V82A/L90M/I93L	1000	IC50(nM)	No	CHEMBL1140100
amprenavir	CC(C)CN(C[C@@H](O)[C@H](Cc1ccccc1)NC(=O)O[C@H]1CCOC1)S(=O)(=O)c1ccc(N)cc1	33	L10I/K43T/M46L/I54V/L63P/A71V/V82A/L90M/Q92K	300	IC50(nM)	No	CHEMBL1140100
indinavir	CC(C)(C)NC(=O)[C@@H]1CN(Cc2cccnc2)CCN1C[C@@H](O)C[C@@H](Cc1ccccc1)C(=O)N[C@H]1c2ccccc2C[C@H]1O	26	L10I/K43T/M46L/I54V/L63P/A71V/V82A/L90M/Q92K	1000	IC50(nM)	No	CHEMBL1140100
amprenavir	CC(C)CN(C[C@@H](O)[C@H](Cc1ccccc1)NC(=O)O[C@H]1CCOC1)S(=O)(=O)c1ccc(N)cc1	33	L10I/L24I/I33F/E35D/M36I/N37S/M46L/I54V/R57K/I62V/L63P/A71V/G73S/V82A	430	IC50(nM)	No	CHEMBL1140100
indinavir	CC(C)(C)NC(=O)[C@@H]1CN(Cc2cccnc2)CCN1C[C@@H](O)C[C@@H](Cc1ccccc1)C(=O)N[C@H]1c2ccccc2C[C@H]1O	26	L10I/L24I/I33F/E35D/M36I/N37S/M46L/I54V/R57K/I62V/L63P/A71V/G73S/V82A	1000	IC50(nM)	No	CHEMBL1140100
amprenavir	CC(C)CN(C[C@@H](O)[C@H](Cc1ccccc1)NC(=O)O[C@H]1CCOC1)S(=O)(=O)c1ccc(N)cc1	33	L10I/K14R/L33I/M36I/M46I/F53I/K55R/I62V/L63P/A71V/G73S/V82A/L90M/I93L	320	IC50(nM)	No	CHEMBL1140100
indinavir	CC(C)(C)NC(=O)[C@@H]1CN(Cc2cccnc2)CCN1C[C@@H](O)C[C@@H](Cc1ccccc1)C(=O)N[C@H]1c2ccccc2C[C@H]1O	26	L10I/K14R/L33I/M36I/M46I/F53I/K55R/I62V/L63P/A71V/G73S/V82A/L90M/I93L	1000	IC50(nM)	No	CHEMBL1140100
amprenavir	CC(C)CN(C[C@@H](O)[C@H](Cc1ccccc1)NC(=O)O[C@H]1CCOC1)S(=O)(=O)c1ccc(N)cc1	33	L10I/V11I/T12E/I15V/L19I/R41K/M46L/L63P/A71T/V82A/L90M	340	IC50(nM)	No	CHEMBL1140100
indinavir	CC(C)(C)NC(=O)[C@@H]1CN(Cc2cccnc2)CCN1C[C@@H](O)C[C@@H](Cc1ccccc1)C(=O)N[C@H]1c2ccccc2C[C@H]1O	26	L10I/V11I/T12E/I15V/L19I/R41K/M46L/L63P/A71T/V82A/L90M	290	IC50(nM)	No	CHEMBL1140100
11a	CC(=O)NCCOc1ccc(C[C@H](NC(=O)O[C@H]2CO[C@H]3OCC[C@@H]23)[C@H](O)CN(CC(C)C)S(=O)(=O)c2ccc3c(c2)OCO3)cc1	140	M46I/L63P/A71V/V82L/I84V	52	IC50(nM)	No	CHEMBL1140366
11b	CC(=O)NCCCOc1ccc(C[C@H](NC(=O)O[C@H]2CO[C@H]3OCC[C@@H]23)[C@H](O)CN(CC(C)C)S(=O)(=O)c2ccc3c(c2)OCO3)cc1	57	M46I/L63P/A71V/V82L/I84V	18	IC50(nM)	No	CHEMBL1140366
12b	COC(=O)NCCCOc1ccc(C[C@H](NC(=O)O[C@H]2CO[C@H]3OCC[C@@H]23)[C@H](O)CN(CC(C)C)S(=O)(=O)c2ccc3c(c2)OCO3)cc1	2.8	M46I/L63P/A71V/V82L/I84V	2.6	IC50(nM)	No	CHEMBL1140366
12c	COC(=O)NCCCCOc1ccc(C[C@H](NC(=O)O[C@H]2CO[C@H]3OCC[C@@H]23)[C@H](O)CN(CC(C)C)S(=O)(=O)c2ccc3c(c2)OCO3)cc1	2.6	M46I/L63P/A71V/V82L/I84V	2.6	IC50(nM)	No	CHEMBL1140366
13c	CNC(=O)NCCCCOc1ccc(C[C@H](NC(=O)O[C@H]2CO[C@H]3OCC[C@@H]23)[C@H](O)CN(CC(C)C)S(=O)(=O)c2ccc3c(c2)OCO3)cc1	60	M46I/L63P/A71V/V82L/I84V	26	IC50(nM)	No	CHEMBL1140366
14a	CC(C)CN(C[C@@H](O)[C@H](Cc1ccc(OCCNC(=O)N(C)C)cc1)NC(=O)O[C@H]1CO[C@H]2OCC[C@@H]12)S(=O)(=O)c1ccc2c(c1)OCO2	37	M46I/L63P/A71V/V82L/I84V	9.1	IC50(nM)	No	CHEMBL1140366
15a	CC(C)CN(C[C@@H](O)[C@H](Cc1ccc(OCCNS(C)(=O)=O)cc1)NC(=O)O[C@H]1CO[C@H]2OCC[C@@H]12)S(=O)(=O)c1ccc2c(c1)OCO2	62	M46I/L63P/A71V/V82L/I84V	9.1	IC50(nM)	No	CHEMBL1140366
15b	CC(C)CN(C[C@@H](O)[C@H](Cc1ccc(OCCCNS(C)(=O)=O)cc1)NC(=O)O[C@H]1CO[C@H]2OCC[C@@H]12)S(=O)(=O)c1ccc2c(c1)OCO2	41	M46I/L63P/A71V/V82L/I84V	20	IC50(nM)	No	CHEMBL1140366
15c	CC(C)CN(C[C@@H](O)[C@H](Cc1ccc(OCCCCNS(C)(=O)=O)cc1)NC(=O)O[C@H]1CO[C@H]2OCC[C@@H]12)S(=O)(=O)c1ccc2c(c1)OCO2	15	M46I/L63P/A71V/V82L/I84V	5.9	IC50(nM)	No	CHEMBL1140366
1	COC(=O)NCCCCC(C)(C)CN(C[C@@H](O)[C@H](Cc1ccccc1)NC(=O)O[C@H]1CO[C@H]2OCC[C@@H]12)S(=O)(=O)c1ccc2c(c1)OCO2	2.2	M46I/L63P/A71V/V82L/I84V	19	IC50(nM)	No	CHEMBL1140366
atazanavir	COC(=O)N[C@H](C(=O)N[C@@H](Cc1ccccc1)[C@@H](O)CN(Cc1ccc(-c2ccccn2)cc1)NC(=O)[C@@H](NC(=O)OC)C(C)(C)C)C(C)(C)C	25	M46I/L63P/A71V/V82L/I84V	93	IC50(nM)	No	CHEMBL1140366
lopinavir	Cc1cccc(C)c1OCC(=O)N[C@@H](Cc1ccccc1)[C@@H](O)C[C@H](Cc1ccccc1)NC(=O)[C@H](C(C)C)N1CCCNC1=O	40	M46I/L63P/A71V/V82L/I84V	400	IC50(nM)	No	CHEMBL1140366
indinavir	CC(C)(C)NC(=O)[C@@H]1CN(Cc2cccnc2)CCN1C[C@@H](O)C[C@@H](Cc1ccccc1)C(=O)N[C@H]1c2ccccc2C[C@H]1O	50	M46I/L63P/A71V/V82L/I84V	330	IC50(nM)	No	CHEMBL1140366
10a	CC(C)CN(C[C@@H](O)[C@H](Cc1ccc(OCCN)cc1)NC(=O)O[C@H]1CO[C@H]2OCC[C@@H]12)S(=O)(=O)c1ccc2c(c1)OCO2	180	L10I/L19Q/K20R/E35D/M36I/S37N/M46I/I50V/I54V/I62V/L63P/A71V/V82A/L90M/E28K/K32E/V35I/T39T/E40DV/M41L/K43E/Y181Y	130	IC50(nM)	No	CHEMBL1140366
10b	CC(C)CN(C[C@@H](O)[C@H](Cc1ccc(OCCCN)cc1)NC(=O)O[C@H]1CO[C@H]2OCC[C@@H]12)S(=O)(=O)c1ccc2c(c1)OCO2	67	L10I/L19Q/K20R/E35D/M36I/S37N/M46I/I50V/I54V/I62V/L63P/A71V/V82A/L90M/E28K/K32E/V35I/T39T/E40DV/M41L/K43E/Y181Y	65	IC50(nM)	No	CHEMBL1140366
10c	CC(C)CN(C[C@@H](O)[C@H](Cc1ccc(OCCCCN)cc1)NC(=O)O[C@H]1CO[C@H]2OCC[C@@H]12)S(=O)(=O)c1ccc2c(c1)OCO2	15	L10I/L19Q/K20R/E35D/M36I/S37N/M46I/I50V/I54V/I62V/L63P/A71V/V82A/L90M/E28K/K32E/V35I/T39T/E40DV/M41L/K43E/Y181Y	28	IC50(nM)	No	CHEMBL1140366
11a	CC(=O)NCCOc1ccc(C[C@H](NC(=O)O[C@H]2CO[C@H]3OCC[C@@H]23)[C@H](O)CN(CC(C)C)S(=O)(=O)c2ccc3c(c2)OCO3)cc1	140	L10I/L19Q/K20R/E35D/M36I/S37N/M46I/I50V/I54V/I62V/L63P/A71V/V82A/L90M/E28K/K32E/V35I/T39T/E40DV/M41L/K43E/Y181Y	53	IC50(nM)	No	CHEMBL1140366
11b	CC(=O)NCCCOc1ccc(C[C@H](NC(=O)O[C@H]2CO[C@H]3OCC[C@@H]23)[C@H](O)CN(CC(C)C)S(=O)(=O)c2ccc3c(c2)OCO3)cc1	57	L10I/L19Q/K20R/E35D/M36I/S37N/M46I/I50V/I54V/I62V/L63P/A71V/V82A/L90M/E28K/K32E/V35I/T39T/E40DV/M41L/K43E/Y181Y	20	IC50(nM)	No	CHEMBL1140366
11c	CC(=O)NCCCCOc1ccc(C[C@H](NC(=O)O[C@H]2CO[C@H]3OCC[C@@H]23)[C@H](O)CN(CC(C)C)S(=O)(=O)c2ccc3c(c2)OCO3)cc1	39	L10I/L19Q/K20R/E35D/M36I/S37N/M46I/I50V/I54V/I62V/L63P/A71V/V82A/L90M/E28K/K32E/V35I/T39T/E40DV/M41L/K43E/Y181Y	16	IC50(nM)	No	CHEMBL1140366
12a	COC(=O)NCCOc1ccc(C[C@H](NC(=O)O[C@H]2CO[C@H]3OCC[C@@H]23)[C@H](O)CN(CC(C)C)S(=O)(=O)c2ccc3c(c2)OCO3)cc1	3	L10I/L19Q/K20R/E35D/M36I/S37N/M46I/I50V/I54V/I62V/L63P/A71V/V82A/L90M/E28K/K32E/V35I/T39T/E40DV/M41L/K43E/Y181Y	7.1	IC50(nM)	No	CHEMBL1140366
13a	CNC(=O)NCCOc1ccc(C[C@H](NC(=O)O[C@H]2CO[C@H]3OCC[C@@H]23)[C@H](O)CN(CC(C)C)S(=O)(=O)c2ccc3c(c2)OCO3)cc1	200	L10I/L19Q/K20R/E35D/M36I/S37N/M46I/I50V/I54V/I62V/L63P/A71V/V82A/L90M/E28K/K32E/V35I/T39T/E40DV/M41L/K43E/Y181Y	130	IC50(nM)	No	CHEMBL1140366
13b	CNC(=O)NCCCOc1ccc(C[C@H](NC(=O)O[C@H]2CO[C@H]3OCC[C@@H]23)[C@H](O)CN(CC(C)C)S(=O)(=O)c2ccc3c(c2)OCO3)cc1	119	L10I/L19Q/K20R/E35D/M36I/S37N/M46I/I50V/I54V/I62V/L63P/A71V/V82A/L90M/E28K/K32E/V35I/T39T/E40DV/M41L/K43E/Y181Y	43	IC50(nM)	No	CHEMBL1140366
13c	CNC(=O)NCCCCOc1ccc(C[C@H](NC(=O)O[C@H]2CO[C@H]3OCC[C@@H]23)[C@H](O)CN(CC(C)C)S(=O)(=O)c2ccc3c(c2)OCO3)cc1	60	L10I/L19Q/K20R/E35D/M36I/S37N/M46I/I50V/I54V/I62V/L63P/A71V/V82A/L90M/E28K/K32E/V35I/T39T/E40DV/M41L/K43E/Y181Y	22	IC50(nM)	No	CHEMBL1140366
14a	CC(C)CN(C[C@@H](O)[C@H](Cc1ccc(OCCNC(=O)N(C)C)cc1)NC(=O)O[C@H]1CO[C@H]2OCC[C@@H]12)S(=O)(=O)c1ccc2c(c1)OCO2	37	L10I/L19Q/K20R/E35D/M36I/S37N/M46I/I50V/I54V/I62V/L63P/A71V/V82A/L90M/E28K/K32E/V35I/T39T/E40DV/M41L/K43E/Y181Y	11	IC50(nM)	No	CHEMBL1140366
14b	CC(C)CN(C[C@@H](O)[C@H](Cc1ccc(OCCCNC(=O)N(C)C)cc1)NC(=O)O[C@H]1CO[C@H]2OCC[C@@H]12)S(=O)(=O)c1ccc2c(c1)OCO2	25	L10I/L19Q/K20R/E35D/M36I/S37N/M46I/I50V/I54V/I62V/L63P/A71V/V82A/L90M/E28K/K32E/V35I/T39T/E40DV/M41L/K43E/Y181Y	11	IC50(nM)	No	CHEMBL1140366
14c	CC(C)CN(C[C@@H](O)[C@H](Cc1ccc(OCCCCNC(=O)N(C)C)cc1)NC(=O)O[C@H]1CO[C@H]2OCC[C@@H]12)S(=O)(=O)c1ccc2c(c1)OCO2	65	L10I/L19Q/K20R/E35D/M36I/S37N/M46I/I50V/I54V/I62V/L63P/A71V/V82A/L90M/E28K/K32E/V35I/T39T/E40DV/M41L/K43E/Y181Y	32	IC50(nM)	No	CHEMBL1140366
15a	CC(C)CN(C[C@@H](O)[C@H](Cc1ccc(OCCNS(C)(=O)=O)cc1)NC(=O)O[C@H]1CO[C@H]2OCC[C@@H]12)S(=O)(=O)c1ccc2c(c1)OCO2	62	L10I/L19Q/K20R/E35D/M36I/S37N/M46I/I50V/I54V/I62V/L63P/A71V/V82A/L90M/E28K/K32E/V35I/T39T/E40DV/M41L/K43E/Y181Y	20	IC50(nM)	No	CHEMBL1140366
1	COC(=O)NCCCCC(C)(C)CN(C[C@@H](O)[C@H](Cc1ccccc1)NC(=O)O[C@H]1CO[C@H]2OCC[C@@H]12)S(=O)(=O)c1ccc2c(c1)OCO2	2.2	L10I/L19Q/K20R/E35D/M36I/S37N/M46I/I50V/I54V/I62V/L63P/A71V/V82A/L90M/E28K/K32E/V35I/T39T/E40DV/M41L/K43E/Y181Y	15	IC50(nM)	No	CHEMBL1140366
atazanavir	COC(=O)N[C@H](C(=O)N[C@@H](Cc1ccccc1)[C@@H](O)CN(Cc1ccc(-c2ccccn2)cc1)NC(=O)[C@@H](NC(=O)OC)C(C)(C)C)C(C)(C)C	25	L10I/L19Q/K20R/E35D/M36I/S37N/M46I/I50V/I54V/I62V/L63P/A71V/V82A/L90M/E28K/K32E/V35I/T39T/E40DV/M41L/K43E/Y181Y	70	IC50(nM)	No	CHEMBL1140366
lopinavir	Cc1cccc(C)c1OCC(=O)N[C@@H](Cc1ccccc1)[C@@H](O)C[C@H](Cc1ccccc1)NC(=O)[C@H](C(C)C)N1CCCNC1=O	40	L10I/L19Q/K20R/E35D/M36I/S37N/M46I/I50V/I54V/I62V/L63P/A71V/V82A/L90M/E28K/K32E/V35I/T39T/E40DV/M41L/K43E/Y181Y	1000	IC50(nM)	No	CHEMBL1140366
indinavir	CC(C)(C)NC(=O)[C@@H]1CN(Cc2cccnc2)CCN1C[C@@H](O)C[C@@H](Cc1ccccc1)C(=O)N[C@H]1c2ccccc2C[C@H]1O	50	L10I/L19Q/K20R/E35D/M36I/S37N/M46I/I50V/I54V/I62V/L63P/A71V/V82A/L90M/E28K/K32E/V35I/T39T/E40DV/M41L/K43E/Y181Y	440	IC50(nM)	No	CHEMBL1140366
amprenavir	CC(C)CN(C[C@@H](O)[C@H](Cc1ccccc1)NC(=O)O[C@H]1CCOC1)S(=O)(=O)c1ccc(N)cc1	130	L10I/L19Q/K20R/E35D/M36I/S37N/M46I/I50V/I54V/I62V/L63P/A71V/V82A/L90M/E28K/K32E/V35I/T39T/E40DV/M41L/K43E/Y181Y	1000	IC50(nM)	No	CHEMBL1140366
nelfinavir	Cc1c(O)cccc1C(=O)N[C@@H](CSc1ccccc1)[C@H](O)CN1C[C@H]2CCCC[C@H]2C[C@H]1C(=O)NC(C)(C)C	320	L10I/L19Q/K20R/E35D/M36I/S37N/M46I/I50V/I54V/I62V/L63P/A71V/V82A/L90M/E28K/K32E/V35I/T39T/E40DV/M41L/K43E/Y181Y	1000	IC50(nM)	No	CHEMBL1140366
m	Nc1ccc(S(=O)(=O)N(C[C@@H](O)[C@H](Cc2ccccc2)NC(=O)O[C@H]2CO[C@H]3OCC[C@@H]23)OC2CCCC2)cc1	9	M46I/L63P/A71V/V82L/I84V	212	IC50(nM)	Yes	CHEMBL1142752
u	O=C(N[C@@H](Cc1ccccc1)[C@H](O)CN(OC1CCCCC1)S(=O)(=O)c1ccc2c(c1)OCO2)O[C@H]1CO[C@H]2OCC[C@@H]12	13	M46I/L63P/A71V/V82L/I84V	107	IC50(nM)	Yes	CHEMBL1142752
v	O=C(N[C@@H](Cc1ccccc1)[C@H](O)CN(OC1CCCCC1)S(=O)(=O)c1ccc2c(c1)OCCO2)O[C@H]1CO[C@H]2OCC[C@@H]12	3	M46I/L63P/A71V/V82L/I84V	100	IC50(nM)	Yes	CHEMBL1142752
amprenavir	CC(C)CN(C[C@@H](O)[C@H](Cc1ccccc1)NC(=O)O[C@H]1CCOC1)S(=O)(=O)c1ccc(N)cc1	150	M46I/L63P/A71V/V82L/I84V	440	IC50(nM)	Yes	CHEMBL1142752
m	Nc1ccc(S(=O)(=O)N(C[C@@H](O)[C@H](Cc2ccccc2)NC(=O)O[C@H]2CO[C@H]3OCC[C@@H]23)OC2CCCC2)cc1	9	L10I/L19Q/K20R/E35D/M36I/S37N/M46I/I50V/I54V/I62V/L63P/A71V/V82A/L90M/E28K/K32E/V35I/T39T/E40DV/M41L/K43E/Y181Y	240	IC50(nM)	Yes	CHEMBL1142752
p	O=C(N[C@@H](Cc1ccccc1)[C@H](O)CN(OC1CCCC1)S(=O)(=O)c1ccc2c(c1)OCCO2)O[C@H]1CO[C@H]2OCC[C@@H]12	7	L10I/L19Q/K20R/E35D/M36I/S37N/M46I/I50V/I54V/I62V/L63P/A71V/V82A/L90M/E28K/K32E/V35I/T39T/E40DV/M41L/K43E/Y181Y	194	IC50(nM)	Yes	CHEMBL1142752
t	O=C(N[C@@H](Cc1ccccc1)[C@H](O)CN(OC1CCCCC1)S(=O)(=O)c1ccc(O)cc1)O[C@H]1CO[C@H]2OCC[C@@H]12	5	L10I/L19Q/K20R/E35D/M36I/S37N/M46I/I50V/I54V/I62V/L63P/A71V/V82A/L90M/E28K/K32E/V35I/T39T/E40DV/M41L/K43E/Y181Y	117	IC50(nM)	Yes	CHEMBL1142752
u	O=C(N[C@@H](Cc1ccccc1)[C@H](O)CN(OC1CCCCC1)S(=O)(=O)c1ccc2c(c1)OCO2)O[C@H]1CO[C@H]2OCC[C@@H]12	13	L10I/L19Q/K20R/E35D/M36I/S37N/M46I/I50V/I54V/I62V/L63P/A71V/V82A/L90M/E28K/K32E/V35I/T39T/E40DV/M41L/K43E/Y181Y	240	IC50(nM)	Yes	CHEMBL1142752
TYA5	CC(C)(C)NC(=O)[C@@H]1C[C@@H]2CCCC[C@@H]2CN1C[C@@H](O)[C@H](Cc1ccccc1)NC(=O)[C@@H](C[S+]([O-])c1ccc2ccccc2c1)NS(C)(=O)=O	15	L10I/K14R/R41K/M46L/I54V/L63P/A71V/V82A/L90M/I93L	34	IC50(nM)	Yes	CHEMBL1144922
TYB1	CC(C)CN(C[C@@H](O)[C@@H](/C=C/[C@@H](C[S+]([O-])c1ccc2ccccc2c1)NS(C)(=O)=O)Cc1ccccc1)S(=O)(=O)c1ccc(N)cc1	180	L10I/K14R/R41K/M46L/I54V/L63P/A71V/V82A/L90M/I93L	1000	IC50(nM)	Yes	CHEMBL1144922
TYB5	CC(C)CN(C[C@@H](O)[C@H](Cc1ccccc1)NC(=O)[C@@H](C[S+]([O-])c1ccc2ccccc2c1)NS(C)(=O)=O)S(=O)(=O)c1ccc(N)cc1	31	L10I/L24I/I33F/E35D/M36I/N37S/M46L/I54V/R57K/I62V/L63P/A71V/G73S/V82A	25	IC50(nM)	Yes	CHEMBL1144922
1	CC(C)CN(C[C@@H](O)[C@H](Cc1ccccc1)NC(=O)O[C@H]1CO[C@H]2OCC[C@@H]12)S(=O)(=O)c1ccc(N)cc1	3	L10I/K14R/L33I/M36I/M46I/F53L/K55R/I62V/L63P/A71V/G73S/V82A/L90M/I93L	10.2	IC50(nM)	No	CHEMBL1146019
3	CC(C)CN(CC(O)C(Cc1ccccc1)NC(=O)O[C@@H]1C[C@@H]2CCO[C@@H]2C1)S(=O)(=O)c1ccc(CO)cc1	1.8	L10I/K14R/L33I/M36I/M46I/F53L/K55R/I62V/L63P/A71V/G73S/V82A/L90M/I93L	15	IC50(nM)	No	CHEMBL1146019
3	CC(C)CN(CC(O)C(Cc1ccccc1)NC(=O)O[C@@H]1C[C@@H]2CCO[C@@H]2C1)S(=O)(=O)c1ccc(CO)cc1	1.8	I10L/I15V/K20R/M36I/M46L/I54V/K55R/I62V/L63P/K70Q/V82A/L89M	5	IC50(nM)	No	CHEMBL1146019
1	CC(C)CN(C[C@@H](O)[C@H](Cc1ccccc1)NC(=O)O[C@H]1CO[C@H]2OCC[C@@H]12)S(=O)(=O)c1ccc(N)cc1	3	L10I/V11I/T12E/I15V/L19I/R41K/M46L/L63P/A71T/V82A/L90M	3.7	IC50(nM)	No	CHEMBL1146019
1	CC(C)CN(C[C@@H](O)[C@H](Cc1ccccc1)NC(=O)O[C@H]1CO[C@H]2OCC[C@@H]12)S(=O)(=O)c1ccc(N)cc1	3	L10I/K14R/R41K/M46L/I54V/L63P/A71V/V82A/L90M/I93L	3.5	IC50(nM)	No	CHEMBL1146019
6	CC(C)CN(C[C@@H](O)[C@H](Cc1ccc(Oc2cccnc2)cc1)NC(=O)O[C@H]1CO[C@H]2OCC[C@@H]12)S(=O)(=O)c1ccc2c(c1)OCO2	1.1	M46I/L63P/A71V/V82L/I84V	2.4	IC50(nM)	No	CHEMBL1146125
12	CC(C)CN(C[C@@H](O)[C@H](Cc1ccc(Oc2ccc(CNS(C)(=O)=O)cc2)cc1)NC(=O)O[C@H]1CO[C@H]2OCC[C@@H]12)S(=O)(=O)c1ccc2c(c1)OCO2	7.2	M46I/L63P/A71V/V82L/I84V	5.3	IC50(nM)	No	CHEMBL1146125
13	COC(=O)NCc1ccc(Oc2ccc(C[C@H](NC(=O)O[C@H]3CO[C@H]4OCC[C@@H]34)[C@H](O)CN(CC(C)C)S(=O)(=O)c3ccc4c(c3)OCO4)cc2)cc1	1.3	M46I/L63P/A71V/V82L/I84V	2.2	IC50(nM)	No	CHEMBL1146125
2	CC(C)CN(C[C@@H](O)[C@H](Cc1ccc(Oc2ccc(F)cc2)cc1)NC(=O)O[C@H]1CO[C@H]2OCC[C@@H]12)S(=O)(=O)c1ccc2c(c1)OCO2	3.3	L10I/L19Q/K20R/E35D/M36I/S37N/M46I/I50V/I54V/I62V/L63P/A71V/V82A/L90M/E28K/K32E/V35I/T39T/E40DV/M41L/K43E/Y181Y	29	IC50(nM)	No	CHEMBL1146125
3	CC(C)CN(C[C@@H](O)[C@H](Cc1ccc(Oc2cccc(F)c2)cc1)NC(=O)O[C@H]1CO[C@H]2OCC[C@@H]12)S(=O)(=O)c1ccc2c(c1)OCO2	5.7	L10I/L19Q/K20R/E35D/M36I/S37N/M46I/I50V/I54V/I62V/L63P/A71V/V82A/L90M/E28K/K32E/V35I/T39T/E40DV/M41L/K43E/Y181Y	48	IC50(nM)	No	CHEMBL1146125
5	COc1cccc(Oc2ccc(C[C@H](NC(=O)O[C@H]3CO[C@H]4OCC[C@@H]34)[C@H](O)CN(CC(C)C)S(=O)(=O)c3ccc4c(c3)OCO4)cc2)c1	4.7	L10I/L19Q/K20R/E35D/M36I/S37N/M46I/I50V/I54V/I62V/L63P/A71V/V82A/L90M/E28K/K32E/V35I/T39T/E40DV/M41L/K43E/Y181Y	41	IC50(nM)	No	CHEMBL1146125
Z2	CC(C)(C)NC(=O)[C@@H]1CN(CCCC(F)(F)F)CCN1C[C@@H](O)C[C@@H](Cc1ccccc1)C(=O)NC1c2ccccc2C[C@H]1O	15.3	L10V/K20M/L24I/S37D/M46I/I54V/L63P/A71V/V82T	568	IC50(nM)	No	CHEMBL1135057
Z8	Cn1cc(CN2CCN(C[C@@H](O)C[C@@H](Cc3ccccc3)C(=O)NC3c4ccccc4C[C@H]3O)[C@H](C(=O)NC(C)(C)C)C2)c2ccccc21	6.7	L10V/K20M/L24I/S37D/M46I/I54V/L63P/A71V/V82T	332.2	IC50(nM)	No	CHEMBL1135057
Z9	CC(C)(C)NC(=O)[C@@H]1CN(Cc2ncc(-c3ccccc3)s2)CCN1C[C@@H](O)C[C@@H](Cc1ccccc1)C(=O)NC1c2ccccc2C[C@H]1O	0.26	L10V/K20M/L24I/S37D/M46I/I54V/L63P/A71V/V82T	2	IC50(nM)	No	CHEMBL1135057
Z11	Cn1cc(CN2CCN(C[C@@H](O)C[C@@H](Cc3ccccc3)C(=O)NC3c4ccccc4C[C@H]3O)[C@H](C(=O)NC(C)(C)C)C2)ccc1=O	2.2	L10V/K20M/L24I/S37D/M46I/I54V/L63P/A71V/V82T	131	IC50(nM)	No	CHEMBL1135057
Z12	CC(C)(C)NC(=O)[C@@H]1CN(CC2(c3ccccc3)CC2)CCN1C[C@@H](O)C[C@@H](Cc1ccccc1)C(=O)NC1c2ccccc2C[C@H]1O	7.7	L10V/K20M/L24I/S37D/M46I/I54V/L63P/A71V/V82T	257	IC50(nM)	No	CHEMBL1135057
Z14	CC(C)(C)NC(=O)[C@@H]1CN(Cc2cccc(C(C)(C)NC(=O)OC(C)(C)C)c2)CCN1C[C@@H](O)C[C@@H](Cc1ccccc1)C(=O)NC1c2ccccc2C[C@H]1O	28	L10V/K20M/L24I/S37D/M46I/I54V/L63P/A71V/V82T	392.4	IC50(nM)	No	CHEMBL1135057
5	CC(C)CN(C[C@@H](O)[C@H](Cc1ccccc1)NC(=O)O[C@H]1C2CO[C@H]3OCC1C3C2)S(=O)(=O)c1ccc2nc(NC3CC3)sc2c1	0.39	L10I/I15V/K20R/L24I/V32I/L33F/M36I/M46L/I54M/L63P/K70Q/V82I/I84V/L89M	35	IC50(nM)	Yes	CHEMBL4049446
